# Supplementary material for: Common carp aquaculture in Neolithic China dates back 8,000 years
Source: Springer Nature journal article supplement (doi:10.1038/s41559-019-0974-3), 2019-09-16
Supplement: 41559_2019_974_MOESM1_ESM.pdf [file 41559_2019_974_MOESM1_ESM.pdf]

In the format provided by the authors and unedited.

# Common carp aquaculture in Neolithic China dates back 8,000 years

Tsuneo Nakajima <sup>1\*</sup>, Mark J. Hudson<sup>2</sup>, Junzo Uchiyama<sup>3</sup>, Keisuke Makibayashi<sup>4</sup> and Juzhong Zhang<sup>5</sup>

---

<sup>1</sup>Lake Biwa Museum, Kusatsu, Japan. <sup>2</sup>Eurasia3angle Research Group, Max Planck Institute for the Science of Human History, Jena, Germany. <sup>3</sup>Sainsbury Institute for the Study of Japanese Arts and Cultures, University of East Anglia, Norwich, UK. <sup>4</sup>Research Center for Asian Archaeology of Industry and Culture, Ehime University, Matsuyama, Japan. <sup>5</sup>Department for the History of Science and Scientific Archaeology, University of Science and Technology of China, Hefei, China. \*e-mail: [nakajima.tsuneo@sage.ocn.ne.jp](mailto:nakajima.tsuneo@sage.ocn.ne.jp)

## Supplementary Information for

### Common carp aquaculture in Neolithic China dates back 8000 years

Tsuneo Nakajima, Mark J. Hudson, Junzo Uchiyama, Keisuke Makibayashi, Juzhong Zhang

#### Correspondence to:

Tsuneo Nakajima, [nakajima.tsuneo@sage.ocn.ne.jp](mailto:nakajima.tsuneo@sage.ocn.ne.jp)

Lake Biwa Museum, 1091 Oroshimo, Kusatsu, Shiga Prefecture 525-0001, Japan

#### Contents

Supplementary Figure 1. Location of Jiahu, Tianluoshan and the Japanese archaeological sites.

Supplementary Figure 2. Left pharyngeal bone and pharyngeal teeth of common carp, *Cyprinus carpio*.

Supplementary Figure 3. Measurements of A2 tooth of common carp, *Cyprinus carpio*.

Supplementary Figure 4. Standard body length regression for contemporary common carp.

Supplementary Table 1. Frequency of cyprinid pharyngeal bones and teeth from the Jiahu site by cultural period.

Supplementary Table 2. Pharyngeal bone samples with A2 teeth and measurements from the Jiahu site.

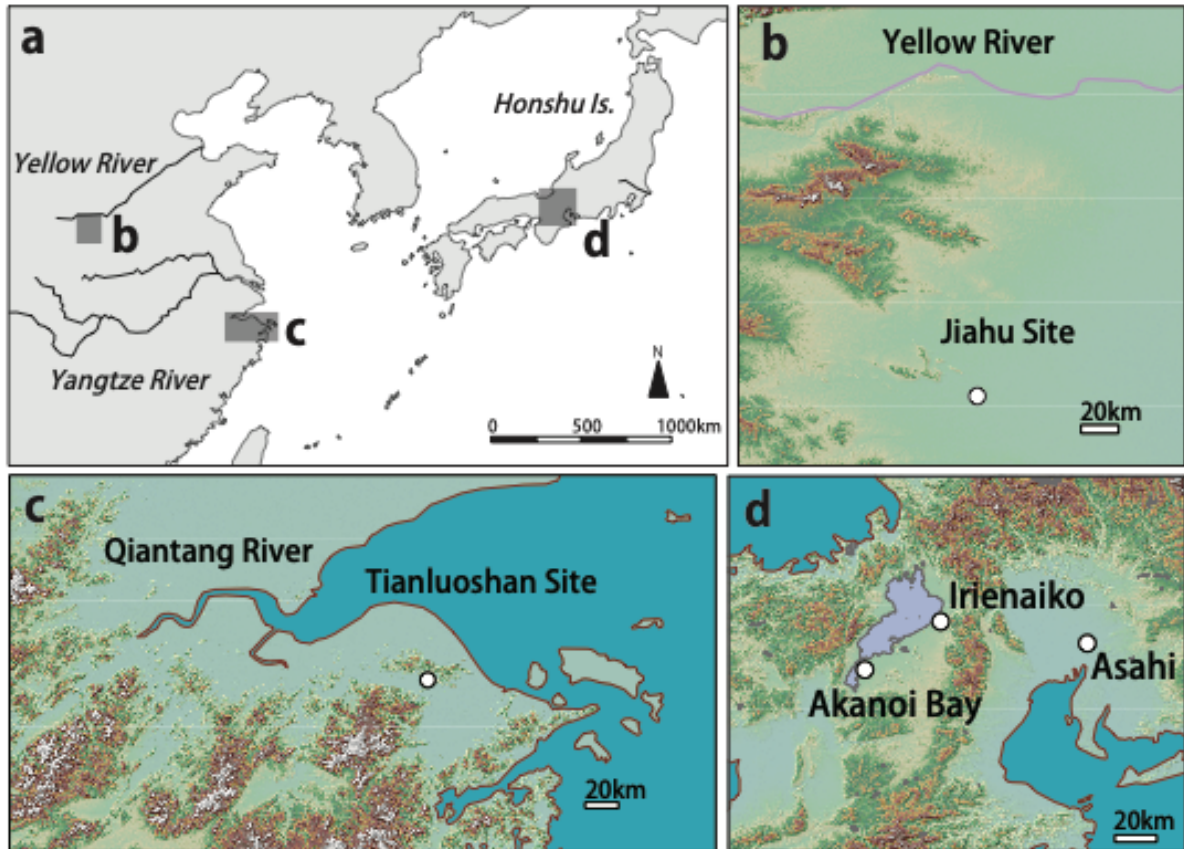

**Supplementary Figure 1. Location of Jiahu (b), Tianluoshan (c) and the Japanese archaeological sites (d).** The Jiahu 賈湖 site is located 22 km north of Wuyang, Henan Province, and the Tianluoshan 田螺山 is situated 22 km northwest of Ningbo, in northeast Zhejiang Province, P.R. China. The Asahi 朝日 site is shared between Kiyosu city and Nishi ward of Nagoya city, Aichi prefecture, Japan. Irienaiko 入江内湖 is in Maibara city and the Akanoi Bay 赤野井湾 site in Moriyama city, Shiga prefecture. Maps made using topographic data from NASA's Distributed Active Archive Centers (DAACs) (<https://earthdata.nasa.gov>) and Natural Land Numerical Information, Policy Bureau of the Ministry of Land, Infrastructure, Transport and Tourism in Japan (<http://nlftp.mlit.go.jp/ksj-c/index.html>).

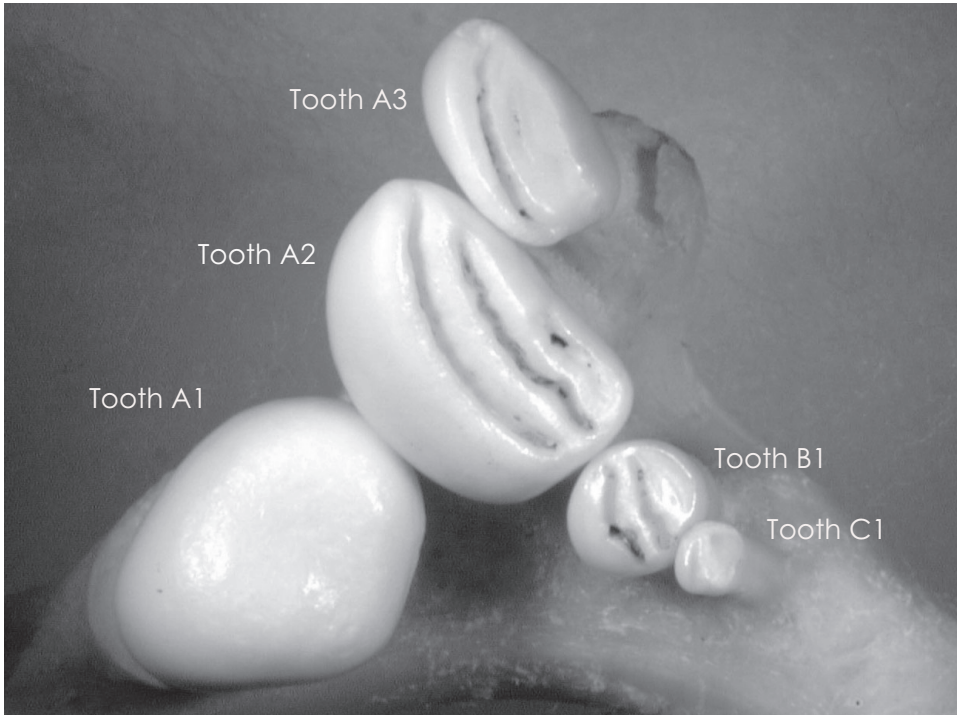

**Supplementary Figure 2. Left pharyngeal bone and pharyngeal teeth of common carp, *Cyprinus carpio*.** There are three teeth in row A, one tooth in row B, and one tooth in row C.

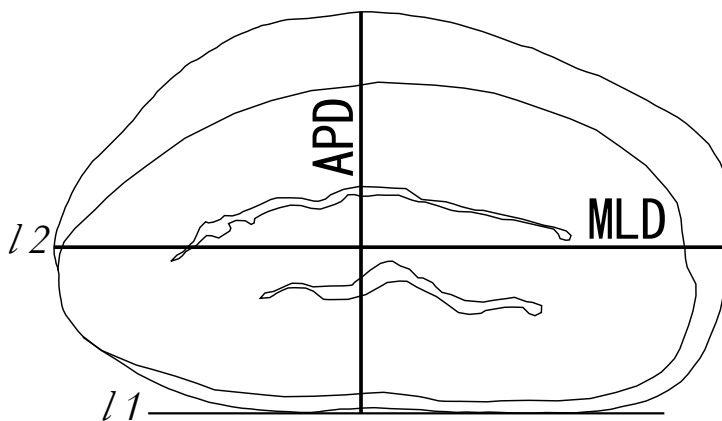

**Supplementary Figure 3. Measurements of A2 tooth of common carp, *Cyprinus carpio*.** MLD is the maximum mesio-lateral length ( $l_2$ ) along an axis parallel to the posterior margin ( $l_1$ ). APD is the maximum antero-posterior length along an axis orthogonal to MLD.

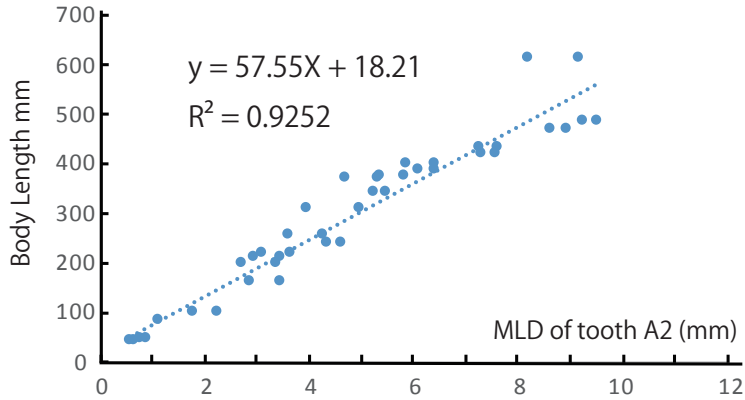

**Supplementary Figure 4. Standard body length regression for contemporary common carp.** Based on a sample (n = 39) from Lake Biwa, Japan.

**Supplementary Table 1. Frequency of cyprinid pharyngeal bones and teeth from the Jiahu site by cultural period.**

| Cyprinid                            | Jiahu I | Jiahu II | Jiahu III | Sub-totals |
|-------------------------------------|---------|----------|-----------|------------|
| <i>Cyprinus carpio</i>              | 87      | 684      | 77        | 848        |
| <i>Ctenopharyngodon idella</i>      | 27      | 65       | 15        | 107        |
| <i>Mylopharyngodon piceus</i>       | 11      | 46       | 6         | 63         |
| <i>Carassius auratus</i>            | 3       | 21       | 4         | 28         |
| <i>Cyprinus longzhouensis</i>       | 0       | 20       | 0         | 20         |
| <i>Megalobrama</i> sp.              | 1       | 38       | 2         | 41         |
| <i>Culter</i> sp.                   | 1       | 1        | 1         | 3          |
| <i>Elopichthys bambusa</i>          | 0       | 1        | 0         | 1          |
| <i>Cultrichthys</i> sp.             | 0       | 1        | 0         | 1          |
| <i>Cultrinae</i> , gen et sp indet. | 0       | 6        | 4         | 10         |
| <i>Barbinae</i> , gen et sp indet.  | 0       | 3        | 3         | 6          |
| <b>Total</b>                        | 130     | 886      | 112       | 1128       |

**Supplementary Table 2. Pharyngeal bone samples with A2 teeth and measurements from the Jiahu site. The data are sorted by cultural period. The total number of A2 teeth where the MLD could be measured is 588 (Period I= 47, Period II= 483, Period III= 58).**

| ID   | Provenance | Period | Pharyngeal teeth |       |       |       | Status of A2   |        |                 | Note        |
|------|------------|--------|------------------|-------|-------|-------|----------------|--------|-----------------|-------------|
|      |            |        | L/R              | A row | B row | C row | No. of grooves | MLD mm | Estimated BL mm |             |
| 972  | H494       | 1      | L                | 2     | 1     | 1     | 3              | 5.38   | 328.06          |             |
| 973  | H494       | 1      | R                | 1,2   | 1     |       | ?              | 5.16   | 315.29          |             |
| 977  | H494       | 1      | L                | 2     | 1     |       | 2              | 5.54   | 337.42          |             |
| 979  | H494       | 1      | L                | 1,2   |       |       | 2              | 4.74   | 291.48          |             |
| 980  | H494       | 1      | R                | 1,2   | 1     | 1     | 3.5            | 7.25   | 435.66          |             |
| 981  | H494       | 1      | R                | 1,2   | 1     | 2     | 3              | 5.10   | 312.16          |             |
| 983  | H494       | 1      | R                | 1,2   |       |       | 3              | 5.41   | 329.56          |             |
| 984  | H494       | 1      | R                | 1,2   | 1     |       | 3              | 6.47   | 390.87          |             |
| 985  | H494       | 1      | R                | 1,2   | 1     |       | 2              | 4.94   | 302.91          |             |
| 1013 | H494       | 1      | R                | 2,3   |       |       | 2.5            | 4.57   | 281.53          |             |
| 1018 | H494       | 1      | L                | 1,2   | 1     |       | 3.5            | 7.24   | 435.27          |             |
| 1019 | H494       | 1      | L                | 2     |       |       | 2.5            | 4.79   | 293.92          | loose tooth |
| 1039 | H494       | 1      | L                | 1,2   | 1     | 1     | 3              | 5.16   | 315.65          |             |
| 1040 | H494       | 1      | L                | 1,2   | 1     |       | 2              | 4.62   | 284.45          |             |
| 1042 | H494       | 1      | L                | 1,2   | 1     |       | 2              | 4.86   | 297.98          |             |
| 1044 | H494       | 1      | L                | 1,2   | 1     |       | 2              | 5.02   | 307.56          |             |
| 1046 | H494       | 1      | R                | 1,2   | 1     | 1     | 2              | 5.02   | 307.23          |             |
| 1048 | H494       | 1      | R                | 2     |       |       | 3              | 5.32   | 324.41          | loose tooth |
| 1049 | H494       | 1      | L                | 2     |       |       | 2.5            | 4.84   | 297.07          | loose tooth |
| 1050 | H494       | 1      | R                | 2     |       |       | 3              | 4.61   | 283.66          | loose tooth |
| 1052 | H479       | 1      | L                | 1,2   |       |       | 3              | 7.76   | 464.96          |             |
| 1055 | H479       | 1      | R                | 1,2   | 1     | 1     | 2              | 4.63   | 284.73          |             |
| 1056 | H479       | 1      | R                | 2     | 1     |       | 2              | 5.88   | 357.05          |             |
| 1057 | H479       | 1      | R                | 2,3   | 1     |       | 3              | 5.94   | 360.45          |             |
| 1062 | H479       | 1      | L                | 1,2   | 1     |       | 2              | 3.73   | 233.33          |             |
| 1064 | H479       | 1      | L                | 1,2   |       |       | 2              | 3.59   | 224.87          |             |
| 1065 | H479       | 1      | L                | 2     | 1     |       | 3              | 5.49   | 334.46          |             |
| 1066 | H479       | 1      | R                | 1,2   |       |       | 3              | 6.16   | 373.00          |             |
| 1067 | H479       | 1      | R                | 1,2,3 |       |       | 1.5            | 2.86   | 182.79          |             |
| 1068 | H479       | 1      | R                | 1,2   |       |       | 2              | 4.34   | 268.46          |             |
| 1069 | H479       | 1      | R                | 1,2   | 1     | 1     | 3              | 6.90   | 415.87          |             |
| 1071 | H479       | 1      | L                | 1,2   | 1     |       | 4              | 7.39   | 444.14          |             |
| 1072 | H479       | 1      | L                | 1,2   |       |       | 3              | 5.68   | 345.26          |             |
| 1073 | H479       | 1      | L                | 2     |       |       | 3              | 7.89   | 472.73          | loose tooth |
| 1074 | H479       | 1      | L                | 1,2,3 |       |       | 2.5            | 5.96   | 361.50          |             |
| 1078 | H479       | 1      | R                | 1,2,3 |       |       | 3.5            | 6.67   | 402.64          |             |
| 1085 | H489       | 1      | L                | 1,2,3 | 1     |       | 3              | 5.49   | 334.51          |             |
| 1087 | H489       | 1      | L                | 1,2   |       | 1     | 3              | 5.96   | 361.65          |             |
| 1088 | H489       | 1      | L                | 2     | 1     | 1     | 3              | 6.02   | 364.85          |             |
| 1089 | H489       | 1      | L                | 1,2   | 1     | 1     | 3              | 6.17   | 373.51          |             |
| 1090 | H489       | 1      | L                | 1,2   | 1     | 1     | 3              | 4.84   | 296.75          |             |
| 1091 | H489       | 1      | R                | 1,2   | 1     |       | 3.5            | 6.52   | 393.54          |             |
| 1129 | H466       | 1      | L                | 1,2   | 1     |       | ?              | 3.14   | 199.27          |             |
| 1131 | H466       | 1      | L                | 2     | 1     |       | 2              | 4.01   | 249.34          |             |

| ID   | Provenance | Period | Pharyngeal teeth |       |       | Status of A2 |                |        | Note   |                 |
|------|------------|--------|------------------|-------|-------|--------------|----------------|--------|--------|-----------------|
|      |            |        | L/R              | A row | B row | C row        | No. of grooves | MLD mm |        | Estimated BL mm |
| 1132 | H466       | 1      | R                | 1,2   |       |              | 4              | 6.40   | 387.07 |                 |
| 1135 | H466       | 1      | L                | 1,2   |       |              | 2              | 4.45   | 274.55 |                 |
| 1136 | H466       | 1      | R                | 1,2   | 1     |              | 2              | 3.46   | 217.77 |                 |
| 1    | F50        | 2      | L                | 1,2,3 | 1     |              | 3              | 4.55   | 280.45 |                 |
| 2    | F50        | 2      | L                | 1,2   | 1     | 1            | 3              | 3.95   | 245.78 |                 |
| 3    | F50        | 2      | L                | 1,2   | 1     | 1            | ?              | 4.55   | 280.12 |                 |
| 4    | F50        | 2      | R                | 1,2,3 | 1     | 1            | 2              | 3.51   | 220.64 |                 |
| 5    | F50        | 2      | R                | 1,2,3 | 1     | 1            | 2              | 3.71   | 231.75 |                 |
| 6    | F50        | 2      | R                | 1,2   |       |              | 2              | 4.22   | 261.34 |                 |
| 22   | F50        | 2      | L                | 1,2   | 1     | 1            | 2?             | 5.44   | 331.38 |                 |
| 23   | F50        | 2      | L                | 1,2   |       |              | 2              | 4.02   | 250.02 |                 |
| 28   | F50        | 2      | L                | 1,2   | 1     |              | 1.5            | 3.83   | 238.64 |                 |
| 29   | F50        | 2      | R                | 1,2   |       |              | 2              | 5.40   | 329.33 |                 |
| 30   | F50        | 2      | R                | 1,2   | 1     | 1            | 2              | 4.48   | 276.09 |                 |
| 32   | F50        | 2      | R                | 1,2   | 1     | 1            | 2              | 3.47   | 218.08 |                 |
| 33   | F50        | 2      | R                | 2     | 1     |              | 3              | 5.53   | 336.79 |                 |
| 35   | F50        | 2      | R                | 1,2   | 1     |              | 1              | 2.48   | 161.03 |                 |
| 36   | WJF50      | 2      | L                | 1,2   | 1     |              | 2              | 5.65   | 343.73 |                 |
| 37   | WJF50      | 2      | L                | 2     | 1     | 1            | 3              | 6.33   | 383.07 |                 |
| 40   | WJF50      | 2      | L                | 1,2   | 1     |              | 1              | 2.89   | 184.43 |                 |
| 42   | WJF50      | 2      | L                | 1,2,3 | 1     |              | 1              | 3.70   | 231.11 |                 |
| 44   | WJF50      | 2      | R                | 1,2,3 | 1     |              | 3              | 5.33   | 325.18 |                 |
| 45   | WJF50      | 2      | R                | 1,2   | 1     |              | 3              | 7.40   | 444.39 |                 |
| 46   | WJF50      | 2      | R                | 1,2   | 1     | 1            | 3              | 5.78   | 350.91 |                 |
| 47   | WJF50      | 2      | R                | 1,2   | 1     |              | 2              | 4.34   | 267.96 |                 |
| 48   | WJF50      | 2      | R                | 1,2   | 1     | 1            | 2              | 3.88   | 241.76 |                 |
| 49   | WJF50      | 2      | R                | 1,2   | 1     |              | 3              | 6.62   | 399.53 |                 |
| 50   | WJF50      | 2      | R                | 1,2   |       |              | 2              | 3.93   | 244.50 |                 |
| 60   | WJF50      | 2      | L                | 1,2   |       |              | 1              | 4.18   | 258.82 |                 |
| 61   | WJF50      | 2      | L                | 1,2,3 | 1     |              | 2              | 3.84   | 239.40 |                 |
| 62   | WJF50      | 2      | L                | 1,2,3 | 1     | 1            | 2              | 3.42   | 214.97 |                 |
| 70   | WJT43H483  | 2      | L                | 2,3   | 1     | 1            | 2              | 4.15   | 256.99 |                 |
| 72   | WJT43H483  | 2      | L                | 1,2   |       | 1            | 2              | 2.63   | 169.93 |                 |
| 77   | WJT43H483  | 2      | L                | 1,2   | 1     |              | 2              | 5.05   | 309.24 |                 |
| 79   | WJT43H483  | 2      | L                | 1,2   |       |              | 2.5            | 5.02   | 307.29 |                 |
| 80   | WJT43H483  | 2      | L                | 2     | 1     |              | 2.5            | 2.73   | 175.31 |                 |
| 81   | WJT43H483  | 2      | L                | 1,2   | 1     |              | 2.5            | 4.50   | 277.12 |                 |
| 82   | WJT43H483  | 2      | L                | 1,2   | 1     |              | 2.5            | 3.98   | 247.20 |                 |
| 83   | WJT43H483  | 2      | R                | 1,2   | 1     | 1            | 2              | 2.87   | 183.34 |                 |
| 84   | WJT43H483  | 2      | R                | 1,2   | 1     |              | 1+             | 3.81   | 237.52 |                 |
| 85   | WJT43H483  | 2      | R                | 2     |       |              | 2.5            | 4.33   | 267.60 | loose tooth     |
| 86   | WJT43H483  | 2      | R                | 2     |       |              | 2.5            | 4.21   | 260.66 | loose tooth     |
| 87   | WJT43H483  | 2      | R                | 1,2   |       |              | 2              | 4.98   | 304.89 |                 |
| 88   | WJT43H483  | 2      | R                | 1,2   |       |              | 2              | 3.44   | 216.43 |                 |
| 89   | WJT43H483  | 2      | R                | 2     | 1     |              | 2              | 3.12   | 198.09 |                 |
| 90   | WJT43H483  | 2      | R                | 1,2   | 1     |              | 2.5            | 4.43   | 273.10 |                 |
| 91   | WJT43H483  | 2      | R                | 1,2   | 1     |              | 2              | 3.07   | 194.76 |                 |
| 92   | WJT43H483  | 2      | R                | 1,2   | 1     | 1            | 2.5            | 4.92   | 301.31 |                 |
| 93   | WJT43H483  | 2      | R                | 1,2   |       | 1            | 2              | 4.15   | 257.11 |                 |

| ID  | Provenance  | Period | Pharyngeal teeth |        |       |       | Status of A2   |        |                 | Note        |
|-----|-------------|--------|------------------|--------|-------|-------|----------------|--------|-----------------|-------------|
|     |             |        | L/R              | A row  | B row | C row | No. of grooves | MLD mm | Estimated BL mm |             |
| 94  | WJT43H483   | 2      | R                | 1,2    |       | 1     | 2              | 3.95   | 245.46          |             |
| 95  | WJT43H483   | 2      | R                | 1,2    | 1     |       | 2              | 2.55   | 164.86          |             |
| 96  | WJT43H483   | 2      | R                | 1,2,3  | ?     | 1     | 2              | 3.37   | 212.33          |             |
| 97  | WJT43H483   | 2      | R                | 1,2,3  | 1     |       | 2              | 4.79   | 294.16          |             |
| 98  | WJT43H483   | 2      | R                | 1,2,3  |       |       | 1+             | 3.04   | 193.29          |             |
| 100 | WJT43H483   | 2      | R                | 1,2    | 1     | 1     | 2              | 3.47   | 217.84          |             |
| 101 | WJT43H483   | 2      | R                | 2      |       | 1     | 1+             | 2.68   | 172.40          |             |
| 102 | WJT43H483   | 2      | R                | 2,3    | 1     |       | 1              | 3.29   | 207.85          |             |
| 103 | WJT43H483   | 2      | R                | 1,2    |       |       | 2              | 4.33   | 267.53          |             |
| 104 | WJT43H483   | 2      | R                | 1,2,3  | 1     |       | 1+             | 2.40   | 156.57          |             |
| 181 | WJT106AH474 | 2      | L                | 1,2    |       |       | 2.5            | 4.04   | 250.84          |             |
| 182 | WJT106AH474 | 2      | L                | 1,2    | 1     |       | 1.5            | 3.01   | 191.40          |             |
| 183 | WJT106AH474 | 2      | L                | 1,2,3  | 1     |       | 2              | 3.63   | 227.46          |             |
| 184 | WJT106AH474 | 2      | L                | 1,2    | 1     |       | 2              | 4.48   | 276.13          |             |
| 185 | WJT106AH474 | 2      | L                | 1,2    | 1     | 1     | 2              | 4.31   | 266.64          |             |
| 187 | WJT106AH474 | 2      | L                | 1,2,3  |       |       | 2              | 3.69   | 230.85          |             |
| 188 | WJT106AH474 | 2      | R                | 1,,2   | 1     |       | 2              | 3.07   | 195.17          |             |
| 189 | WJT106AH474 | 2      | L                | 1,2    |       |       | 2              | 3.71   | 232.11          |             |
| 190 | WJT106AH474 | 2      | R                | 1,2    |       |       | 2.5            | 4.64   | 285.36          |             |
| 195 | WJT106AH474 | 2      | L                | 1,2    | 1     |       | 2              | 3.70   | 231.24          |             |
| 196 | WJT106AH474 | 2      | L                | 1,2    | 1     | 1     | 2              | 3.45   | 217.01          |             |
| 197 | WJT106AH474 | 2      | L                | 1,2    | 1     |       | 2.5            | 3.64   | 227.76          |             |
| 198 | WJT106AH474 | 2      | L                | 1,2    |       |       | 2              | 3.33   | 210.01          |             |
| 199 | WJT106AH474 | 2      | L                | 1,2,3  | 1     | 1     | 3              | 4.86   | 298.02          |             |
| 200 | WJT106AH474 | 2      | L                | 1,2    |       |       | 2              | 3.74   | 233.58          |             |
| 201 | WJT106AH474 | 2      | L                | 1,2    | 1     |       | 3              | 4.04   | 250.98          |             |
| 202 | WJT106AH474 | 2      | L                | 1,2    |       |       | 2.5            | 4.01   | 249.24          |             |
| 203 | WJT106AH474 | 2      | L                | 1,2    |       |       | 3              | 5.59   | 340.11          |             |
| 204 | WJT106AH474 | 2      | L                | 1,2,3  |       |       | 2              | 3.94   | 245.33          |             |
| 205 | WJT106AH474 | 2      | L                | 1,2,,3 |       |       | ?2             | 3.73   | 233.11          |             |
| 206 | WJT106AH474 | 2      | R                | 1,2    | 1     | 1     | 2              | 2.80   | 179.63          |             |
| 207 | WJT106AH474 | 2      | R                | 1,2    | 1     |       | 2              | 3.38   | 213.10          |             |
| 209 | WJT106AH474 | 2      | R                | 2      | 1     |       | 2.5            | 4.03   | 250.46          |             |
| 210 | WJT106AH474 | 2      | R                | 2      | 1     | 1     | 2.5            | 3.72   | 232.73          |             |
| 211 | WJT106AH474 | 2      | R                | 1,2    |       |       | 3              | 6.17   | 373.32          |             |
| 212 | WJT106AH474 | 2      | R                | 2      |       | 1     | 3              | 4.08   | 253.00          |             |
| 214 | WJT106AH474 | 2      | R                | 1,2    | 1     | 1     | 2.5            | 3.93   | 244.78          |             |
| 215 | WJT106AH474 | 2      | R                | 1,2    | 1     |       | 2              | 2.62   | 169.06          |             |
| 223 | WJT106AH474 | 2      | L                | 1,2,3  | 1     |       | 2              | 2.83   | 181.44          |             |
| 224 | WJT106AH474 | 2      | L                | 1,2    |       |       | 3              | 6.29   | 380.71          |             |
| 225 | WJT106AH474 | 2      | R                | 1,2    |       |       | 3              | 4.18   | 258.75          |             |
| 226 | WJT106AH474 | 2      | R                | 2      | 1     |       | 2              | 2.74   | 175.81          |             |
| 227 | WJT106AH474 | 2      | R                | 2      | 1     |       | 2              | 3.54   | 221.86          |             |
| 228 | WJT106AH474 | 2      | R                | 2      |       |       | 2              | 4.13   | 256.30          | loose tooth |
| 229 | WJT106AH474 | 2      | R                | 2      |       |       | 3              | 3.88   | 241.60          | loose tooth |
| 233 | WJT106AH474 | 2      | L                | 1,2    | 1     | 1     | 3              | 6.11   | 369.96          |             |
| 234 | WJT106AH474 | 2      | L                | 1,2,3  | 1     |       | 3              | 5.38   | 328.17          |             |
| 235 | WJT106AH474 | 2      | L                | 2      | 1     |       | 3              | 4.72   | 289.93          |             |
| 236 | WJT106AH474 | 2      | L                | 1,2,3  |       |       | 2.5            | 3.84   | 239.58          |             |



| ID  | Provenance  | Period | Pharyngeal teeth |       |       |       | Status of A2   |        |                 | Note        |
|-----|-------------|--------|------------------|-------|-------|-------|----------------|--------|-----------------|-------------|
|     |             |        | L/R              | A row | B row | C row | No. of grooves | MLD mm | Estimated BL mm |             |
| 237 | WJT106AH474 | 2      | L                | 1,2   | 1     | 1     | ?2+            | 4.10   | 254.15          |             |
| 239 | WJT106AH474 | 2      | L                | 2     | 1     | 1     | 1.5            | 2.87   | 183.46          |             |
| 240 | WJT106AH474 | 2      | L                | 1,2   |       |       | 2.5            | 2.99   | 190.24          |             |
| 242 | WJT106AH474 | 2      | L                | 1,2   |       |       | 3              | 3.94   | 244.98          |             |
| 243 | WJT106AH474 | 2      | L                | 1,2   |       |       | 2              | 2.89   | 184.50          |             |
| 244 | WJT106AH474 | 2      | L                | 1,2   | 1     |       | 2              | 3.30   | 208.27          |             |
| 246 | WJT106AH474 | 2      | L                | 2     | 1     |       | 2              | 3.88   | 241.97          |             |
| 247 | WJT106AH474 | 2      | L                | 2     | 1     | 1     | 2              | 2.68   | 172.55          |             |
| 248 | WJT106AH474 | 2      | L                | 1,2,3 | 1     | 1     | 2              | 3.21   | 203.06          |             |
| 249 | WJT106AH474 | 2      | L                | 2     | 1     |       | 1.5            | 2.03   | 135.22          |             |
| 250 | WJT106AH474 | 2      | L                | 1,2   |       |       | 2              | 3.95   | 245.67          |             |
| 251 | WJT106AH474 | 2      | L                | 1,2   |       | 1     | 2              | 3.70   | 231.53          |             |
| 252 | WJT106AH474 | 2      | L                | 1,2   | 1     |       | 2              | 4.62   | 284.57          |             |
| 253 | WJT106AH474 | 2      | R                | 1,2   |       |       | 2.5            | 3.75   | 234.14          |             |
| 254 | WJT106AH474 | 2      | R                | 1,2   |       |       | 2              | 3.48   | 218.73          |             |
| 255 | WJT106AH474 | 2      | L                | 1,2,3 | 1     |       | 2              | 4.22   | 260.99          |             |
| 256 | WJT106AH474 | 2      | L                | 2     |       |       | 2              | 4.22   | 261.42          | loose tooth |
| 257 | WJT106AH474 | 2      | L                | 1,2   |       |       | 2              | 3.27   | 206.75          |             |
| 258 | WJT106AH474 | 2      | L                | 1,2   |       |       | 2.5            | 3.96   | 246.48          |             |
| 260 | WJT106AH474 | 2      | L                | 1,2   | 1     |       | 2              | 3.54   | 222.10          |             |
| 262 | WJT106AH474 | 2      | L                | 1,2   |       |       | 2              | 3.47   | 217.87          |             |
| 263 | WJT106AH474 | 2      | R                | 1,2   |       |       | 2.5            | 4.40   | 271.89          |             |
| 265 | WJT106AH474 | 2      | L                | 1,2   |       |       | 2.5            | 3.64   | 227.97          |             |
| 266 | WJT106AH474 | 2      | L                | 1,2   | 1     |       | 2              | 2.98   | 190.05          |             |
| 267 | WJT106AH474 | 2      | L                | 1,2   | 1     | 1     | 2              | 3.79   | 236.37          |             |
| 268 | WJT106AH474 | 2      | L                | 1,2   | 1     | 1     | 2              | 4.16   | 257.80          |             |
| 269 | WJT106AH474 | 2      | L                | 2     | 1     |       | 1              | 4.48   | 276.42          |             |
| 270 | WJT106AH474 | 2      | L                | 1,2   | 1     |       | 2              | 4.35   | 268.63          |             |
| 271 | WJT106AH474 | 2      | L                | 1,2   | 1     |       | 2              | 3.89   | 242.21          |             |
| 275 | WJT106AH474 | 2      | L                | 1,2   |       |       | 2              | 3.34   | 210.55          |             |
| 276 | WJT106AH474 | 2      | L                | 1,2   | 1     |       | ?              | 3.46   | 217.67          |             |
| 277 | WJT106AH474 | 2      | L                | 1,2   |       |       | 2              | 3.31   | 208.85          |             |
| 278 | WJT106AH474 | 2      | L                | 1,2,3 |       |       | 2              | 4.01   | 248.98          |             |
| 279 | WJT106AH474 | 2      | L                | 1,2   |       |       | 2              | 3.80   | 237.25          |             |
| 280 | WJT106AH474 | 2      | L                | 1,2   | 1     |       | 2              | 3.86   | 240.51          |             |
| 282 | WJT106AH474 | 2      | L                | 1,2   | 1     | 1     | 2.5            | 4.53   | 279.24          |             |
| 284 | WJT106AH474 | 2      | L                | 1,2   | 1     |       | 3              | 3.69   | 230.91          |             |
| 285 | WJT106AH474 | 2      | L                | 1,2   | 1     |       | 1              | 4.00   | 248.49          |             |
| 286 | WJT106AH474 | 2      | L                | 1,2,3 |       |       | 2.5            | 4.60   | 283.16          |             |
| 287 | WJT106AH474 | 2      | L                | 1,2   | 1     | 1     | 2.5            | 4.79   | 294.32          |             |
| 288 | WJT106AH474 | 2      | L                | 1,2   | 1     | 1     | 1              | 4.69   | 288.26          |             |
| 290 | WJT106AH474 | 2      | L                | 1,2   | 1     | 1     | 2.5            | 3.86   | 240.42          |             |
| 291 | WJT106AH474 | 2      | L                | 1,2   | 1     |       | 2              | 3.72   | 232.53          |             |
| 292 | WJT106AH474 | 2      | L                | 1,2   | 1     |       | 2              | 3.85   | 240.21          |             |
| 293 | WJT106AH474 | 2      | L                | 1,2   |       |       | 2              | 3.81   | 237.89          |             |
| 296 | WJT106AH474 | 2      | R                | 1,2   |       |       | 2              | 5.31   | 323.96          |             |
| 297 | WJT106AH474 | 2      | L                | 2     |       |       | 2              | 3.42   | 215.23          | loose tooth |
| 298 | WJT106AH474 | 2      | R                | 1,2   |       |       | 2              | 4.02   | 249.99          |             |
| 300 | WJT106AH474 | 2      | R                | 1,2   | 1     | 1     | ?1             | 3.97   | 246.60          |             |

| ID  | Provenance  | Period | Pharyngeal teeth |       |       | Status of A2 |                |        | Note |                 |             |
|-----|-------------|--------|------------------|-------|-------|--------------|----------------|--------|------|-----------------|-------------|
|     |             |        | L/R              | A row | B row | C row        | No. of grooves | MLD mm |      | Estimated BL mm |             |
| 302 | WJT106AH474 | 2      | R                | 1,2   | 1     |              |                | 2      | 4.61 | 283.84          |             |
| 303 | WJT106AH474 | 2      | R                | 1,2   | 1     |              |                | 2      | 4.86 | 297.97          |             |
| 305 | WJT106AH474 | 2      | R                | 1,2   |       |              |                | 2      | 3.23 | 204.05          |             |
| 306 | WJT106AH474 | 2      | R                | 1,2   | 1     |              |                | 2.5    | 4.98 | 304.88          |             |
| 307 | WJT106AH474 | 2      | R                | 1,2   |       |              |                | 3      | 4.68 | 287.83          |             |
| 308 | WJT106AH474 | 2      | R                | 1,2   | 1     |              | 1              | 2      | 3.58 | 224.38          |             |
| 309 | WJT106AH474 | 2      | R                | 2     |       |              |                | 2      | 3.48 | 218.61          | loose tooth |
| 310 | WJT106AH474 | 2      | R                | 1,2   | 1     |              |                | 3      | 4.67 | 287.40          |             |
| 311 | WJT106AH474 | 2      | R                | 1,2   | 1     |              | 1              | 2      | 5.13 | 313.97          |             |
| 312 | WJT106AH474 | 2      | R                | 1,2   |       |              |                | 2      | 3.45 | 217.18          |             |
| 314 | WJT106AH474 | 2      | R                | 1,2   |       |              |                | 3      | 4.15 | 257.33          |             |
| 315 | WJT106AH474 | 2      | R                | 1,2   | 1     |              | 1              | 2      | 3.52 | 220.91          |             |
| 316 | WJT106AH474 | 2      | R                | 2     | 1     |              |                | 2      | 2.93 | 186.72          |             |
| 318 | WJT106AH474 | 2      | R                | 1,2   |       |              |                | 2      | 3.91 | 243.18          |             |
| 320 | WJT106AH474 | 2      | R                | 1,2   | 1     |              |                | 2      | 3.41 | 214.53          |             |
| 321 | WJT106AH474 | 2      | R                | 1,2   |       |              |                | 2      | 3.58 | 224.21          |             |
| 324 | WJT106AH474 | 2      | R                | 1,2   | 1     |              |                | 2      | 3.04 | 193.50          |             |
| 327 | WJT106AH474 | 2      | R                | 1,2,3 |       |              |                | 2      | 3.29 | 207.76          |             |
| 328 | WJT106AH474 | 2      | R                | 1,2   | 1     |              |                | 3      | 4.27 | 264.15          |             |
| 330 | WJT106AH474 | 2      | R                | 1,2   | 1     |              |                | 2      | 3.89 | 242.42          |             |
| 331 | WJT106AH474 | 2      | R                | 2     | 1     |              | 1              | 2      | 3.20 | 202.63          |             |
| 332 | WJT106AH474 | 2      | R                | 2     |       |              |                | 2      | 3.36 | 211.76          | loose tooth |
| 333 | WJT106AH474 | 2      | R                | 2     | 1     |              | 1              | 2      | 3.92 | 244.11          |             |
| 335 | WJT106AH474 | 2      | R                | 1,2   | 1     |              |                | 2      | 3.45 | 217.02          |             |
| 336 | WJT106AH474 | 2      | R                | 1,2   | 1     |              |                | 2      | 4.21 | 260.63          |             |
| 337 | WJT106AH474 | 2      | R                | 2     | 1     |              |                | 2      | 3.35 | 211.00          |             |
| 338 | WJT106AH474 | 2      | R                | 2     |       |              |                | 2      | 3.69 | 230.66          | loose tooth |
| 339 | WJT106AH474 | 2      | L                | 1,2   | 1     |              |                | 2.5    | 3.83 | 238.99          |             |
| 340 | WJT106AH474 | 2      | R                | 1,2   | 1     |              |                | 2      | 3.51 | 220.27          |             |
| 341 | WJT106AH474 | 2      | R                | 1,2   | 1     |              | 1              | 2      | 4.17 | 258.27          |             |
| 342 | WJT106AH474 | 2      | R                | 1,2   |       |              |                | 2      | 5.00 | 306.48          |             |
| 343 | WJT106AH474 | 2      | R                | 1,2   | 1     |              | 1              | 2.5    | 4.33 | 267.67          |             |
| 346 | WJT106AH474 | 2      | R                | 2     | 1     |              |                | 2.5    | 3.17 | 200.99          |             |
| 348 | WJT106AH474 | 2      | R                | 1,2   | 1     |              |                | 1      | 3.02 | 192.25          |             |
| 349 | WJT106AH474 | 2      | R                | 1,2   | 1     |              |                | 2      | 3.42 | 215.07          |             |
| 350 | WJT106AH474 | 2      | R                | 1,2   | 1     |              |                | 2.5    | 3.80 | 236.82          |             |
| 351 | WJT106AH474 | 2      | R                | 1,2,3 |       |              |                | 2      | 3.30 | 208.49          |             |
| 352 | WJT106AH474 | 2      | L                | 2     |       |              |                | 2.5    | 4.18 | 259.15          | loose tooth |
| 353 | WJT106AH474 | 2      | R                | 1,2,3 | 1     |              |                | 2      | 3.40 | 214.21          |             |
| 354 | WJT106AH474 | 2      | R                | 1,2   | 1     |              |                | 2      | 3.44 | 216.61          |             |
| 355 | WJT106AH474 | 2      | R                | 1,2   | 1     |              | 1              | 2.5    | 4.14 | 256.58          |             |
| 356 | WJT106AH474 | 2      | L                | 1,2   |       |              |                | 1.5    | 3.78 | 236.03          |             |
| 358 | WJT106AH474 | 2      | R                | 1,2   |       |              |                | 2      | 2.87 | 183.73          |             |
| 359 | WJT106AH474 | 2      | R                | 1,2   |       |              |                | 2      | 4.51 | 277.71          |             |
| 362 | WJT106AH474 | 2      | R                | 2,3   |       |              |                | 3      | 3.73 | 233.11          |             |
| 363 | WJT106AH474 | 2      | R                | 1,2   | 1     |              |                | 2.5    | 4.23 | 261.61          |             |
| 366 | WJT106AH474 | 2      | R                | 1,2   | 1     |              |                | 1.5    | 3.07 | 194.88          |             |
| 459 | H460        | 2      | L                | 1,2   | 1     |              |                | 2      | 3.57 | 223.87          |             |
| 461 | H460        | 2      | L                | 2,3   |       |              |                | 1+     | 3.55 | 222.88          |             |

| ID  | Provenance | Period | Pharyngeal teeth |       |       |       | Status of A2   |        |                 | Note        |
|-----|------------|--------|------------------|-------|-------|-------|----------------|--------|-----------------|-------------|
|     |            |        | L/R              | A row | B row | C row | No. of grooves | MLD mm | Estimated BL mm |             |
| 462 | H460       | 2      | L                | 2     | 1     |       | 2              | 3.65   | 228.58          |             |
| 463 | H460       | 2      | L                | 1,2   | 1     | 1     | ?1             | 3.43   | 215.50          |             |
| 465 | H460       | 2      | L                | 1,2   | 1     | 1     | 2              | 4.45   | 274.34          |             |
| 466 | H460       | 2      | L                | 2     | 1     |       | 2              | 4.01   | 249.35          |             |
| 468 | H460       | 2      | R                | 1,2   | 1     | 1     | 3              | 3.66   | 228.89          |             |
| 469 | H460       | 2      | R                | 1,2   | 1     | 1     | 2              | 3.43   | 215.98          |             |
| 470 | H460       | 2      | R                | 1,2,3 |       |       | 2              | 3.57   | 223.60          |             |
| 472 | H460       | 2      | L                | 1,2   |       | 1     | 2              | 3.23   | 204.00          |             |
| 473 | H460       | 2      | L                | 1,2   | 1     |       | 2              | 2.99   | 190.38          |             |
| 474 | H460       | 2      | R                | 1,2,3 |       |       | 2              | 4.03   | 250.14          |             |
| 475 | H460       | 2      | R                | 1,2   | 1     |       | 2              | 2.79   | 178.67          |             |
| 476 | H460       | 2      | R                | 1,2   | 1     |       | 2              | 3.20   | 202.39          |             |
| 483 | H460       | 2      | L                | 1,2   | 1     | 1     | 3              | 4.56   | 280.75          |             |
| 485 | H460       | 2      | L                | 1,2   |       |       | 2              | 3.41   | 214.45          |             |
| 486 | H460       | 2      | L                | 2     | 3     |       | 2              | 4.32   | 267.01          |             |
| 487 | H460       | 2      | L                | 1,2   | 1     | 1     | 2              | 3.46   | 217.32          |             |
| 488 | H460       | 2      | L                | 2     | 1     |       | 2              | 3.44   | 216.52          |             |
| 490 | H460       | 2      | L                | 1,2   | 1     |       | 2              | 3.52   | 220.87          |             |
| 491 | H460       | 2      | L                | 1,2,3 | 1     |       | 2              | 3.35   | 211.14          |             |
| 492 | H460       | 2      | L                | 1,2   | 1     | 1     | 2              | 3.18   | 201.56          |             |
| 493 | H460       | 2      | L                | 1,2   | 1     | 1     | 2              | 3.00   | 191.19          |             |
| 494 | H460       | 2      | L                | 1,2   | 1     | 1     | 2.5            | 3.74   | 233.65          |             |
| 495 | H460       | 2      | L                | 2     |       |       | 2              | 3.78   | 236.01          | loose tooth |
| 496 | H460       | 2      | L                | 1,2,3 | 1     | 1     | 1+             | 3.55   | 222.94          |             |
| 497 | H460       | 2      | L                | 1,2   | 1     |       | 2.5            | 3.63   | 227.39          |             |
| 498 | H460       | 2      | L                | 1,2,3 | 1     |       |                | 3.56   | 223.35          |             |
| 500 | H460       | 2      | R                | 1,2   | 1     |       | 2              | 4.15   | 257.30          |             |
| 503 | H460       | 2      | R                | 1,2   | 1     | 1     | 3              | 4.56   | 280.83          |             |
| 504 | H460       | 2      | R                | 1,2   | 1     |       | 2              | 3.61   | 226.42          |             |
| 505 | H460       | 2      | R                | 1,2   | 1     | 1     | 2              | 4.12   | 255.64          |             |
| 506 | H460       | 2      | R                | 1,2   | 1     |       | 2              | 3.58   | 224.22          |             |
| 508 | H460       | 2      | R                | 1,2   | 1     | 1     | 2              | 2.79   | 178.82          |             |
| 509 | H460       | 2      | R                | 1,2   | 1     | 1     | 2              | 3.49   | 219.20          |             |
| 511 | H460       | 2      | R                | 1,2   | 1     |       | 2              | 2.71   | 174.41          |             |
| 516 | H460       | 2      | L                | 1,2   | 1     | 1     | 2              | 3.78   | 236.11          |             |
| 517 | H460       | 2      | L                | 1,2   | 1     |       | 2.5            | 4.20   | 259.98          |             |
| 518 | H460       | 2      | L                | 1,2   | 1     | 1     | 3              | 4.75   | 291.75          |             |
| 519 | H460       | 2      | L                | 1,2   | 1     |       | 2              | 3.70   | 231.14          |             |
| 520 | H460       | 2      | L                | 1,2   | 1     |       | 2              | 4.11   | 254.72          |             |
| 521 | H460       | 2      | L                | 2     | 1     | 1     | 2              | 3.26   | 205.82          |             |
| 523 | H460       | 2      | L                | 2     | 1     |       | 2              | 4.39   | 271.11          |             |
| 525 | H460       | 2      | L                | 1,2,3 |       |       | 3              | 3.90   | 243.01          |             |
| 527 | H460       | 2      | L                | 2     | 1     |       | 2              | 2.93   | 187.10          |             |
| 529 | H460       | 2      | R                | 1,2   | 1     |       | 2              | 3.18   | 201.30          |             |
| 530 | H460       | 2      | R                | 1,2,3 | 1     |       | 2+             | 4.73   | 290.77          |             |
| 531 | H460       | 2      | R                | 1,2   | 1     | 1     | 2              | 4.35   | 268.55          |             |
| 532 | H460       | 2      | R                | 1,2   | 1     | 1     | 2              | 3.92   | 244.24          |             |
| 533 | H460       | 2      | R                | 1,2   | 1     |       | 2              | 3.84   | 239.54          |             |
| 535 | H460       | 2      | R                | 2     | 1     |       | 2              | 3.14   | 199.21          |             |

| ID  | Provenance | Period | Pharyngeal teeth |       |       | Status of A2 |                |        | Note   |                 |
|-----|------------|--------|------------------|-------|-------|--------------|----------------|--------|--------|-----------------|
|     |            |        | L/R              | A row | B row | C row        | No. of grooves | MLD mm |        | Estimated BL mm |
| 538 | H460       | 2      | R                | 1,2   | 1     |              | 2              | 4.21   | 260.95 |                 |
| 539 | H460       | 2      | R                | 1,2   |       |              | 2              | 3.41   | 214.38 |                 |
| 540 | H460       | 2      | R                | 2     | 1     |              | 2              | 3.14   | 198.84 |                 |
| 541 | H460       | 2      | L                | 1,2,3 |       |              | 2              | 3.65   | 228.26 |                 |
| 543 | H460       | 2      | L                | 1,2   | 1     | 1            | 2              | 3.33   | 210.27 |                 |
| 544 | H460       | 2      | L                | 1,2   | 1     | 1            | 2.5            | 4.06   | 252.33 |                 |
| 545 | H460       | 2      | L                | 1,2   | 1     | 1            | 2              | 3.49   | 219.28 |                 |
| 546 | H460       | 2      | L                | 1,2   | 1     |              | 2              | 3.84   | 239.20 |                 |
| 547 | H460       | 2      | L                | 1,2   | 1     |              | 2              | 2.86   | 182.81 |                 |
| 548 | H460       | 2      | L                | 2     | 1     | 1            | 2              | 3.52   | 220.83 |                 |
| 549 | H460       | 2      | L                | 1,2   | 1     | 1            | 2              | 3.80   | 237.02 |                 |
| 552 | H460       | 2      | L                | 1,2   |       |              | 2              | 3.97   | 247.06 |                 |
| 553 | H460       | 2      | L                | 1,2   |       |              | 2              | 3.45   | 217.00 |                 |
| 554 | H460       | 2      | R                | 1,2,3 |       |              | 2              | 4.33   | 267.45 |                 |
| 555 | H460       | 2      | R                | 1,2   |       |              | 2              | 3.71   | 231.62 |                 |
| 556 | H460       | 2      | R                | 1,2   |       |              | 2              | 3.43   | 215.50 |                 |
| 557 | H460       | 2      | R                | 1,2   | 1     |              | 2              | 3.44   | 216.60 |                 |
| 558 | H460       | 2      | R                | 1,2   | 1     |              | 2              | 3.98   | 247.38 |                 |
| 559 | H460       | 2      | R                | 1,2   | 1     | 1            | 2              | 4.50   | 277.37 |                 |
| 560 | H460       | 2      | R                | 1,2   | 1     |              | 3              | 3.71   | 231.78 |                 |
| 562 | H460       | 2      | R                | 1,2   | 1     |              | 2.5            | 4.14   | 256.69 |                 |
| 563 | H460       | 2      | R                | 1,2   | 1     | 1            | 1+             | 3.51   | 220.62 |                 |
| 566 | H460       | 2      | R                | 2     | 1     |              | 1+             | 3.01   | 191.51 |                 |
| 567 | H460       | 2      | R                | 1,2   |       |              | 2              | 3.35   | 211.00 |                 |
| 570 | H460       | 2      | L                | 2     | 1     |              | ?1             | 1.96   | 130.86 |                 |
| 578 | H490       | 2      | L                | 1,2   | 1     |              | 2              | 4.21   | 260.96 |                 |
| 579 | H490       | 2      | L                | 1,2   |       |              | 2.5            | 3.86   | 240.58 |                 |
| 580 | H490       | 2      | L                | 2     | 1     | 1            | 2              | 3.67   | 229.74 |                 |
| 581 | H490       | 2      | L                | 1,2   | 1     | 1            | 3              | 4.14   | 256.87 |                 |
| 582 | H490       | 2      | L                | 2     |       |              | 2              | 4.90   | 300.48 | loose tooth     |
| 585 | H490       | 2      | L                | 1,2   | 1     |              | 2              | 4.25   | 262.98 |                 |
| 587 | H490       | 2      | L                | 1,2   |       |              | 2              | 3.91   | 243.31 |                 |
| 588 | H490       | 2      | L                | 1,2   | 1     | 1            | 2              | 3.27   | 206.47 |                 |
| 592 | H490       | 2      | L                | 1,2   |       |              | 2              | 2.10   | 139.44 |                 |
| 593 | H490       | 2      | R                | 2     | 1     |              | 2              | 2.90   | 185.03 |                 |
| 595 | H490       | 2      | R                | 1,2   | 1     | 1            | 3              | 3.71   | 231.75 |                 |
| 596 | H490       | 2      | R                | 2     |       |              | 2.5            | 4.27   | 264.14 | loose tooth     |
| 599 | H490       | 2      | R                | 1,2   |       |              | 2.5            | 4.25   | 263.06 |                 |
| 600 | H490       | 2      | R                | 1,2   | 1     |              | 2.5            | 4.66   | 286.84 |                 |
| 601 | H490       | 2      | R                | 2,3   | 1     |              | 2              | 3.56   | 223.38 |                 |
| 603 | H490       | 2      | R                | 1,2   |       |              | 2              | 3.57   | 223.84 |                 |
| 616 | H483       | 2      | L                | 1,2,3 |       |              | 2.5            | 4.56   | 280.76 |                 |
| 617 | H483       | 2      | L                | 1,2   | 1     |              | 2              | 4.07   | 252.83 |                 |
| 619 | H483       | 2      | L                | 1,2   | 1     |              | 3              | 4.57   | 281.58 |                 |
| 622 | H483       | 2      | L                | 1,2   |       |              | 2              | 4.11   | 254.78 |                 |
| 623 | H483       | 2      | L                | 1,2   | 1     |              |                | 2.80   | 179.25 |                 |
| 627 | H483       | 2      | L                | 2     | 1     |              |                | 4.92   | 301.81 |                 |
| 629 | H483       | 2      | L                | 2     |       |              | 2              | 3.85   | 239.67 | loose tooth     |
| 630 | H483       | 2      | L                | 1,2   |       |              | 2              | 3.72   | 232.40 |                 |

| ID  | Provenance | Period | Pharyngeal teeth |       |       | Status of A2 |                |        | Note   |                 |
|-----|------------|--------|------------------|-------|-------|--------------|----------------|--------|--------|-----------------|
|     |            |        | L/R              | A row | B row | C row        | No. of grooves | MLD mm |        | Estimated BL mm |
| 632 | H483       | 2      | L                | 1,2   |       |              | 2              | 3.45   | 216.81 |                 |
| 634 | H483       | 2      | L                | 2     | 1     | 1            | 2              | 3.27   | 206.39 |                 |
| 635 | H483       | 2      | L                | 1,2   | 1     | 1            | 2              | 3.91   | 243.20 |                 |
| 636 | H483       | 2      | L                | 1,2   |       |              | 2              | 3.70   | 231.11 |                 |
| 637 | H483       | 2      | L                | 2     |       |              | 2              | 4.11   | 254.92 | loose tooth     |
| 638 | H483       | 2      | L                | 1,2   | 1     | 1            | 2              | 2.97   | 189.00 |                 |
| 639 | H483       | 2      | L                | 2     | 1     |              | 2              | 2.74   | 175.95 |                 |
| 640 | H483       | 2      | L                | 1,2   | 1     |              | 2              | 2.51   | 162.51 |                 |
| 642 | H483       | 2      | R                | 2     | 1     |              | ?              | 2.62   | 168.84 |                 |
| 643 | H483       | 2      | R                | 1,2   |       |              | 3              | 7.09   | 426.72 |                 |
| 646 | H483       | 2      | R                | 1,2   | 1     |              | 2              | 5.15   | 315.02 |                 |
| 648 | H483       | 2      | R                | 1,2   | 1     |              | 2              | 3.40   | 214.11 |                 |
| 651 | H483       | 2      | R                | 1,2   | 1     |              | 2.5            | 3.91   | 243.41 |                 |
| 652 | H483       | 2      | R                | 1,2   | 1     |              | 2              | 2.71   | 174.40 |                 |
| 653 | H483       | 2      | R                | 2     |       |              | 2.5            | 4.95   | 303.36 | loose tooth     |
| 654 | H483       | 2      | R                | 1,2   |       |              | 2              | 3.05   | 193.66 |                 |
| 655 | H483       | 2      | R                | 1,2   | 1     |              | 2              | 4.04   | 250.74 |                 |
| 656 | H483       | 2      | R                | 1,2   | 1     |              | 2              | 2.99   | 190.70 |                 |
| 658 | H483       | 2      | R                | 1,2   |       |              | 2              | 3.47   | 218.04 |                 |
| 659 | H483       | 2      | R                | 2     | 1     |              | ?              | 3.45   | 217.10 |                 |
| 660 | H483       | 2      | R                | 2     |       |              | 2              | 3.52   | 220.99 |                 |
| 661 | H483       | 2      | R                | 1,2   | 1     |              | 2              | 3.45   | 216.89 |                 |
| 663 | H483       | 2      | R                | 1,2   |       |              | 2              | 3.80   | 237.23 |                 |
| 665 | H483       | 2      | R                | 2     |       |              | 2              | 3.95   | 245.96 | loose tooth     |
| 666 | H483       | 2      | R                | 1,2   | 1     |              | 2              | 3.77   | 235.49 |                 |
| 668 | H483       | 2      | R                | 1,2   | 1     |              | 2              | 2.85   | 182.13 |                 |
| 672 | T43H483    | 2      | L                | 1,2   |       |              | 2              | 3.47   | 218.08 |                 |
| 673 | T43H483    | 2      | L                | 1,2   | 1     |              | 2              | 4.43   | 273.25 |                 |
| 674 | T43H483    | 2      | L                | 1,2   |       |              | 2              | 4.50   | 277.52 |                 |
| 675 | T43H483    | 2      | L                | 1,2   | 1     | 1            | 2              | 3.38   | 212.80 |                 |
| 677 | T43H483    | 2      | L                | 1,2   | 1     |              | 2              | 3.88   | 241.79 |                 |
| 678 | T43H483    | 2      | L                | 1,2   | 1     | 1            | 2              | 3.05   | 193.60 |                 |
| 679 | T43H483    | 2      | L                | 1,2   | 1     |              | 2.5            | 3.02   | 192.34 |                 |
| 683 | T43H483    | 2      | L                | 1,2   | 1     |              | 2              | 3.77   | 235.50 |                 |
| 689 | T43H483    | 2      | R                | 1,2,3 | 1     | 1            | 2              | 4.80   | 294.40 |                 |
| 692 | T43H483    | 2      | R                | 2     |       |              | 2              | 4.46   | 275.05 | loose tooth     |
| 693 | T43H483    | 2      | R                | 1,2   | 1     |              | 1              | 2.83   | 181.40 |                 |
| 696 | T43H483    | 2      | R                | 1,2   |       |              | 2              | 3.95   | 245.63 |                 |
| 701 | T43H483    | 2      | L                | 1,2   | 1     |              | 3              | 5.46   | 332.98 |                 |
| 702 | T43H483    | 2      | L                | 1,2   | 1     |              | 2.5            | 4.21   | 260.83 |                 |
| 713 | T43H483    | 2      | L                | 1,2   |       |              | 2              | 3.13   | 198.64 |                 |
| 715 | T43H483    | 2      | L                | 2     |       |              | 1              | 3.23   | 204.11 | loose tooth     |
| 719 | T43H483    | 2      | L                | 2     | 1     |              | 1.5            | 3.37   | 212.39 |                 |
| 720 | T43H483    | 2      | L                | 1,2   | 1     | 1            | 2              | 4.26   | 263.84 |                 |
| 723 | T43H483    | 2      | L                | 2     | 1     |              | 2              | 3.90   | 242.72 |                 |
| 724 | T43H483    | 2      | L                | 1,2   |       |              | 2              | 3.43   | 215.99 |                 |
| 725 | T43H483    | 2      | L                | 1,2   | 1     | 1            | 2              | 4.27   | 264.01 |                 |
| 726 | T43H483    | 2      | L                | 1,2   | 1     |              | 2              | 3.01   | 191.70 |                 |
| 727 | T43H483    | 2      | L                | 1,2,3 |       |              | 2              | 3.37   | 212.59 |                 |

| ID  | Provenance | Period | Pharyngeal teeth |       |       | Status of A2 |                |        | Note |                 |             |
|-----|------------|--------|------------------|-------|-------|--------------|----------------|--------|------|-----------------|-------------|
|     |            |        | L/R              | A row | B row | C row        | No. of grooves | MLD mm |      | Estimated BL mm |             |
| 728 | T43H483    | 2      | L                | 1,2   | 1     |              |                | 1+     | 2.37 | 154.60          |             |
| 729 | T43H483    | 2      | L                | 1,2,3 | 1     |              | 1              | 1      | 2.34 | 152.87          |             |
| 731 | T43H483    | 2      | L                | 1,2   |       |              |                | 2      | 3.69 | 230.99          |             |
| 733 | T43H483    | 2      | R                | 1,2   | 1     |              |                | 2      | 2.96 | 188.42          |             |
| 737 | T43H483    | 2      | R                | 2     |       |              |                | 2.5    | 4.55 | 280.45          | loose tooth |
| 738 | T43H483    | 2      | R                | 1,2   | 1     |              |                | 2      | 3.51 | 220.56          |             |
| 741 | T43H483    | 2      | R                | 2     |       |              |                | 2      | 2.53 | 163.85          | loose tooth |
| 742 | T43H483    | 2      | R                | 2     | 1     |              |                | ?      | 3.04 | 193.08          |             |
| 745 | T43H483    | 2      | R                | 1,2   | 1     |              |                | 2      | 3.54 | 222.31          |             |
| 746 | T43H483    | 2      | R                | 1,2   |       |              |                | 2      | 3.57 | 223.90          |             |
| 750 | T43H483    | 2      | R                | 1,2   |       |              |                | 2      | 3.97 | 246.95          |             |
| 751 | T43H483    | 2      | R                | 1,2   | 1     |              | 1              | 2      | 4.30 | 265.90          |             |
| 764 | T43H483    | 2      | L                | 1,2   | 1     |              |                | 2      | 2.60 | 168.15          |             |
| 765 | T43H483    | 2      | L                | 1,2   | 1     |              | 1              | 2      | 2.85 | 182.31          |             |
| 767 | T43H483    | 2      | L                | 1,2   | 1     |              |                | 2      | 3.57 | 223.79          |             |
| 769 | T43H483    | 2      | L                | 1,2,3 |       |              |                | 1      | 2.28 | 149.48          |             |
| 771 | T43H483    | 2      | L                | 1,2   |       |              |                | 2      | 3.00 | 191.17          |             |
| 772 | T43H483    | 2      | L                | 1,2   | 1     |              |                | 2      | 3.81 | 237.64          |             |
| 774 | T43H483    | 2      | L                | 1,2   |       |              |                | 2      | 3.13 | 198.71          |             |
| 775 | T43H483    | 2      | L                | 1,2   | 1     |              | 1              | 1      | 2.91 | 185.60          |             |
| 776 | T43H483    | 2      | L                | 1,2   |       |              |                | 2      | 3.42 | 215.15          |             |
| 777 | T43H483    | 2      | L                | 1,2   | 1     |              |                | 1.5    | 2.14 | 141.65          |             |
| 778 | T43H483    | 2      | L                | 1,2   | 1     |              | 1              | 1      | 2.16 | 142.79          |             |
| 779 | T43H483    | 2      | L                | 1,2   | 1     |              |                | 2      | 2.89 | 184.93          |             |
| 781 | T43H483    | 2      | L                | 1,2   |       |              |                | 2      | 2.75 | 176.61          |             |
| 782 | T43H483    | 2      | L                | 1,2,3 | 1     |              | 1              | 1.5    | 2.35 | 153.58          |             |
| 783 | T43H483    | 2      | L                | 1,2,3 | 1     |              |                | 2      | 2.94 | 187.41          |             |
| 784 | T43H483    | 2      | L                | 1,2   | 1     |              |                | 1.5    | 2.32 | 151.93          |             |
| 786 | T43H483    | 2      | R                | 1,2   |       |              |                | 2      | 3.70 | 231.25          |             |
| 788 | T43H483    | 2      | R                | 1,2,3 | 1     |              |                | 2      | 4.22 | 261.54          |             |
| 789 | T43H483    | 2      | R                | 1,2,3 | 1     |              | 1              | 2      | 3.16 | 200.07          |             |
| 792 | T43H483    | 2      | R                | 1,2   | 1     |              | 1              | 1.5    | 2.52 | 163.38          |             |
| 794 | T43H483    | 2      | R                | 1,2   | 1     |              |                | 1      | 2.64 | 170.54          |             |
| 796 | T43H483    | 2      | R                | 1,2   | 1     |              |                | 2      | 2.33 | 152.56          |             |
| 798 | T43H483    | 2      | R                | 1,2   | 1     |              |                | 1      | 3.00 | 190.75          |             |
| 799 | T43H483    | 2      | R                | 1,2   |       |              | 1              | 2      | 3.40 | 214.06          |             |
| 800 | T43H483    | 2      | R                | 2,3   | 1     |              |                | 2      | 2.63 | 169.84          |             |
| 801 | T43H483    | 2      | R                | 1,2   | 1     |              |                | 2      | 2.43 | 158.16          |             |
| 802 | T43H483    | 2      | R                | 1,2   | 1     |              |                | 1.5    | 2.39 | 155.69          |             |
| 804 | T43H483    | 2      | R                | 1,2   | 1     |              |                | 2      | 3.40 | 213.75          |             |
| 805 | T43H483    | 2      | R                | 1,2   | 1     |              |                | 2      | 2.68 | 172.75          |             |
| 806 | T43H483    | 2      | R                | 1,2   |       |              |                | 2      | 2.26 | 148.51          |             |
| 807 | T43H483    | 2      | R                | 1,2   | 1     |              | 1              | 2      | 2.65 | 170.91          |             |
| 808 | T43H483    | 2      | R                | 1,2   |       |              |                | 2      | 3.33 | 209.88          |             |
| 809 | T43H483    | 2      | R                | 1,2   | 1     |              | 1              | 2      | 2.16 | 142.45          |             |
| 810 | T43H483    | 2      | R                | 1,2   | 1     |              |                | 1      | 1.82 | 123.17          |             |
| 811 | T43H483    | 2      | R                | 1,2   | 1     |              |                | 1+     | 1.84 | 124.27          |             |
| 812 | T43H483    | 2      | R                | 2     | 1     |              |                | 1.5    | 2.34 | 152.86          |             |
| 813 | T43H483    | 2      | R                | 1,2   | 1     |              | 1              | 2      | 2.28 | 149.25          |             |

| ID  | Provenance | Period | Pharyngeal teeth |       |       | Status of A2 |                |        | Note   |                 |
|-----|------------|--------|------------------|-------|-------|--------------|----------------|--------|--------|-----------------|
|     |            |        | L/R              | A row | B row | C row        | No. of grooves | MLD mm |        | Estimated BL mm |
| 814 | T43H483    | 2      | R                | 1,2   |       | 1            | 1              | 2.29   | 150.17 |                 |
| 824 | H455(1)    | 2      | L                | 1,2   |       |              | 2              | 3.88   | 241.42 |                 |
| 825 | H455(1)    | 2      | R                | 1,2,3 | 1     |              | 2.5            | 4.86   | 298.25 |                 |
| 826 | H455(1)    | 2      | R                | 1,2   |       |              | 2              | 3.64   | 227.69 |                 |
| 827 | H455(4)    | 2      | L                | 1,2,3 | 1     | 1            | 4              | 6.32   | 382.32 |                 |
| 828 | H455(4)    | 2      | L                | 1,2   | 1     |              | 3              | 5.54   | 337.54 |                 |
| 829 | H455(4)    | 2      | L                | 1,2,3 | 1     | 1            | 3              | 7.36   | 441.87 |                 |
| 830 | H455(4)    | 2      | L                | 2     | 1     |              | 3              | 5.28   | 322.46 |                 |
| 832 | H455(4)    | 2      | L                | 1,2   | 1     |              | 2              | 4.23   | 261.61 |                 |
| 833 | H455(4)    | 2      | R                | 1,2   | 1     | 1            | 3              | 7.84   | 469.85 |                 |
| 834 | H455(4)    | 2      | R                | 2     | 1     | 1            | 3              | 8.29   | 495.55 |                 |
| 835 | H455(4)    | 2      | R                | 1,2   | 1     | 1            | 3              | 6.34   | 383.28 |                 |
| 836 | H455(4)    | 2      | R                | 1,2   |       |              | 2              | 3.95   | 245.79 |                 |
| 841 | H455(5)    | 2      | L                | 1,2   | 1     |              | 3              | 5.56   | 338.65 |                 |
| 842 | H455(5)    | 2      | R                | 1,2,3 |       |              | 3              | 3.95   | 245.72 |                 |
| 843 | H455(5)    | 2      | L                | 1,2,3 | 1     |              | 3              | 4.47   | 275.44 |                 |
| 856 | H455(6)    | 2      | L                | 1,2   | 1     |              | 2              | 3.11   | 197.12 |                 |
| 858 | H455(6)    | 2      | R                | 1,2   | 1     | 1            | 2.5            | 4.37   | 270.19 |                 |
| 859 | H455(6)    | 2      | R                | 1,2   | 1     | 1            | 2.5            | 4.61   | 283.76 |                 |
| 860 | H455(6)    | 2      | R                | 2     | 1     |              | 3              | 4.26   | 263.83 |                 |
| 862 | H455(6)    | 2      | R                | 1,2   |       |              | 3              | 4.50   | 277.56 |                 |
| 864 | H455(2)    | 2      | L                | 1,2   | 1     | 1            | 2.5            | 4.92   | 301.37 |                 |
| 866 | H455(2)    | 2      | R                | 1,2   | 1     | 1            | 2              | 4.17   | 258.64 |                 |
| 873 | H455(8)    | 2      | L                | 1,2   | 1     | 1            | 3              | 5.31   | 323.97 |                 |
| 875 | H455(8)    | 2      | L                | 1,2   |       |              | 3              | 5.04   | 308.59 |                 |
| 876 | H455(8)    | 2      | L                | 1,2   | 1     |              | 3              | 4.93   | 302.29 |                 |
| 877 | H455(8)    | 2      | L                | 2     | 1     | 1            | 3              | 5.95   | 361.20 |                 |
| 878 | H455(8)    | 2      | L                | 2     | 1     | 1            | 2              | 5.08   | 310.94 |                 |
| 879 | H455(8)    | 2      | L                | 1,2   | 1     |              | 2              | 3.52   | 220.69 |                 |
| 880 | H455(8)    | 2      | L                | 1,2   | 1     |              | 3              | 4.14   | 256.83 |                 |
| 882 | H455(8)    | 2      | R                | 1,2   | 1     | 1            | 2.5            | 3.87   | 241.00 |                 |
| 884 | H455(8)    | 2      | R                | 1,2   |       |              | 1              | 3.16   | 200.39 |                 |
| 889 | H455(8)    | 2      | R                | 1,2   | 1     |              | 2              | 3.62   | 226.96 |                 |
| 895 | H458       | 2      | R                | 1,2   | 1     | 1            | 2.5            | 3.79   | 236.41 |                 |
| 896 | H458       | 2      | R                | 1,2   | 1     | 1            | 3              | 5.29   | 322.64 |                 |
| 897 | H458       | 2      | R                | 1,2   | 1     |              | 3              | 6.73   | 405.70 |                 |
| 898 | H458       | 2      | L                | 1,2   | 1     | 1            | 2              | 3.96   | 246.08 |                 |
| 909 | H458       | 2      | L                | 1,2   | 1     | 1            | 4              | 8.87   | 528.99 |                 |
| 910 | H458       | 2      | L                | 1,2   |       |              | 3              | 8.28   | 495.09 |                 |
| 912 | H458       | 2      | L                | 1,2   | 1     |              | 3              | 6.99   | 420.99 |                 |
| 913 | H458       | 2      | L                | 1,2   | 1     | 1            | 3              | 4.98   | 305.10 |                 |
| 915 | H458       | 2      | L                | 2     |       |              | 3              | 6.89   | 415.28 | loose tooth     |
| 916 | H458       | 2      | L                | 1,2   | 1     | 1            | 3              | 5.90   | 357.82 |                 |
| 917 | H458       | 2      | L                | 2,3   |       |              | 3.5            | 6.88   | 414.52 |                 |
| 918 | H458       | 2      | L                | 1,2   | 1     | 1            | 3              | 5.68   | 345.53 |                 |
| 919 | H458       | 2      | L                | 1,2   |       |              | 2              | 4.43   | 273.34 |                 |
| 920 | H458       | 2      | L                | 1,2   | 1     | 1            | 2              | 3.89   | 242.15 |                 |
| 922 | H458       | 2      | L                | 1,2   |       | 1            | 2              | 3.58   | 224.25 |                 |
| 923 | H458       | 2      | L                | 1,2   | 1     |              | 2.5            | 3.76   | 234.61 |                 |

| ID   | Provenance | Period | Pharyngeal teeth |       |       | Status of A2 |                |        | Note |                 |             |
|------|------------|--------|------------------|-------|-------|--------------|----------------|--------|------|-----------------|-------------|
|      |            |        | L/R              | A row | B row | C row        | No. of grooves | MLD mm |      | Estimated BL mm |             |
| 924  | H458       | 2      | L                | 2     | 1     |              |                | 2.5    | 5.27 | 321.62          |             |
| 925  | H458       | 2      | L                | 2     | 1     |              |                | 2      | 3.71 | 232.13          |             |
| 926  | H458       | 2      | L                | 1,2   |       |              |                | ?      | 7.17 | 430.99          |             |
| 927  | H458       | 2      | L                | 1,2   |       |              |                | 2.5    | 4.35 | 268.63          |             |
| 928  | H458       | 2      | L                | 1,2   | 1     |              |                | 2      | 4.12 | 255.24          |             |
| 929  | H458       | 2      | L                | 2     | 1     | 1            |                | 2      | 5.72 | 347.73          |             |
| 930  | H458       | 2      | L                | 1,2   |       |              |                | 3      | 5.29 | 322.73          |             |
| 931  | H458       | 2      | R                | 1,2   | 1     |              |                | 3      | 5.80 | 352.03          |             |
| 932  | H458       | 2      | R                | 1,2   | 1     |              |                | 3      | 6.97 | 419.91          |             |
| 933  | H458       | 2      | R                | 1,2   | 1     |              |                | 3      | 6.61 | 398.90          |             |
| 934  | H458       | 2      | R                | 1,2   |       |              |                | 3      | 6.28 | 379.99          |             |
| 935  | H458       | 2      | R                | 1,2   | 1     |              |                | 3      | 7.64 | 458.19          |             |
| 936  | H458       | 2      | R                | 1,2,3 | 1     |              |                | 3      | 6.98 | 420.48          |             |
| 937  | H458       | 2      | R                | 1,2,3 | 1     | 1            |                | 3      | 6.31 | 381.49          |             |
| 938  | H458       | 2      | R                | 1,2,3 | 1     | 1            |                | 3      | 6.18 | 374.24          |             |
| 939  | H458       | 2      | R                | 1,2   | 1     | 1            |                | 3      | 6.83 | 411.82          |             |
| 940  | H458       | 2      | R                | 1,2,3 | 1     | 1            |                | 3      | 4.60 | 282.98          |             |
| 941  | H458       | 2      | R                | 1,2   | 1     |              |                | 3      | 5.63 | 342.30          |             |
| 942  | H458       | 2      | R                | 1,2,3 | 1     |              |                | 3      | 6.26 | 379.04          |             |
| 943  | H458       | 2      | R                | 1,2,3 | 1     | 1            |                | 3      | 5.58 | 339.67          |             |
| 944  | H458       | 2      | R                | 1,2   |       |              |                | 2      | 4.19 | 259.71          |             |
| 945  | H458       | 2      | R                | 1,2   | 1     | 1            |                | 2      | 2.69 | 173.13          |             |
| 947  | H458       | 2      | R                | 1,2   | 1     | 1            |                | 2      | 4.25 | 262.75          |             |
| 948  | H458       | 2      | R                | 1,2   | 1     |              |                | 2      | 3.63 | 227.06          |             |
| 949  | H458       | 2      | R                | 1,2   | 1     |              |                | 3      | 5.73 | 347.98          |             |
| 950  | H458       | 2      | R                | 1,2   | 1     |              |                | 3      | 5.62 | 342.05          |             |
| 952  | H458       | 2      | R                | 1,2   | 1     |              |                | 3      | 4.58 | 282.28          |             |
| 953  | H458       | 2      | R                | 2     | 1     | 1            |                | 3      | 4.73 | 290.76          |             |
| 957  | H458       | 2      | R                | 1,2,3 | 1     | 1            |                | 2      | 3.93 | 244.44          |             |
| 958  | H458       | 2      | R                | 1,2   | 1     | 1            |                | 2      | 4.51 | 277.77          |             |
| 960  | H458       | 2      | L                | 1,2   | 1     |              |                | 3      | 5.84 | 354.64          |             |
| 961  | H458       | 2      | R                | 1,2   | 1     | 1            |                | 2.5    | 4.82 | 295.95          |             |
| 962  | H458       | 2      | L                | 1,2   |       |              |                | 3      | 5.61 | 341.37          |             |
| 964  | H458       | 2      | L                | 1,2   | 1     |              |                | 2      | 3.35 | 210.96          |             |
| 965  | H458       | 2      | R                | 2     |       |              |                | 4      | 7.27 | 436.82          | loose tooth |
| 1107 | H496       | 2      | L                | 2     | 1     |              |                | 2      | 2.99 | 190.21          |             |
| 1109 | H496       | 2      | L                | 1,2   | 1     |              |                | 2      | 2.15 | 141.84          |             |
| 1111 | H496       | 2      | R                | 1,2   | 1     |              |                | 2      | 4.69 | 288.51          |             |
| 1113 | H496       | 2      | R                | 1,2   | 1     | 1            |                | 2      | 3.39 | 213.30          |             |
| 1114 | H496       | 2      | R                | 2     |       |              |                | 2.5    | 5.02 | 307.32          | loose tooth |
| 1115 | H496       | 2      | R                | 1,2   |       |              |                | 3      | 5.84 | 354.57          |             |
| 1116 | H496       | 2      | L                | 2     |       |              |                | 3      | 4.95 | 303.44          | loose tooth |
| 1117 | H496       | 2      | L                | 1,2   |       |              |                | 2      | 4.11 | 254.92          |             |
| 1122 | H486       | 2      | R                | 1,2   | 1     |              |                | 2      | 3.87 | 241.35          |             |
| 1126 | H451       | 2      | R                | 1,2   |       |              |                | 2      | 5.41 | 329.80          |             |
| 115  | H485       | 3      | L                | 1,2   | 1     |              |                | 2      | 3.48 | 218.57          |             |
| 116  | H485       | 3      | L                | 1,2   | 1     |              |                | 2      | 2.72 | 174.64          |             |
| 117  | H485       | 3      | L                | 1,2   |       |              |                | 2      | 2.74 | 176.23          |             |
| 118  | H485       | 3      | L                | 1,2   | 1     |              |                | 2      | 4.07 | 252.54          |             |



| ID   | Provenance | Period | Pharyngeal teeth |       |       | Status of A2 |                |        | Note   |                 |
|------|------------|--------|------------------|-------|-------|--------------|----------------|--------|--------|-----------------|
|      |            |        | L/R              | A row | B row | C row        | No. of grooves | MLD mm |        | Estimated BL mm |
| 119  | H485       | 3      | L                | 1,2   | 1     |              | 2              | 3.15   | 199.69 |                 |
| 120  | H485       | 3      | L                | 1,2   | 1     |              | 2              | 3.28   | 206.99 |                 |
| 121  | H485       | 3      | L                | 1,2,3 |       |              | 2              | 3.60   | 225.63 |                 |
| 123  | H485       | 3      | L                | 1,2   | 1     |              | 2              | 2.35   | 153.51 |                 |
| 124  | H485       | 3      | L                | 1,2,3 | 1     |              | ?              | 2.68   | 172.32 |                 |
| 125  | H485       | 3      | L                | 1,2   |       |              | 2              | 2.96   | 188.73 |                 |
| 126  | H485       | 3      | L                | 1,2   | 1     |              | 2              | 2.86   | 182.97 |                 |
| 127  | H485       | 3      | L                | 1,2   | 1     |              | 2              | 2.96   | 188.45 |                 |
| 129  | H485       | 3      | L                | 1,2   | 1     |              | 2              | 3.19   | 202.01 |                 |
| 130  | H485       | 3      | R                | 1,2,3 | 1     |              | 2              | 3.57   | 223.87 |                 |
| 132  | H485       | 3      | R                | 1,2   | 1     |              | 2              | 3.07   | 194.99 |                 |
| 133  | H485       | 3      | R                | 1,2   | 1     |              | 2              | 2.91   | 185.79 |                 |
| 135  | H485       | 3      | R                | 1,2   | 1     | 1            | 2              | 2.97   | 189.55 |                 |
| 136  | H485       | 3      | R                | 1,2,3 | 1     |              | 1.5            | 2.34   | 152.73 |                 |
| 138  | H485       | 3      | R                | 2,3   | 1     |              | ?              | 2.85   | 182.49 |                 |
| 139  | H485       | 3      | R                | 1,2   | 1     | 1            | 2              | 1.94   | 129.68 |                 |
| 140  | H485       | 3      | R                | 1,2   | 1     |              | 2              | 3.12   | 197.93 |                 |
| 141  | H485       | 3      | R                | 1,2   |       |              | 2              | 2.77   | 177.58 |                 |
| 142  | H485       | 3      | L                | 2     |       |              | 3              | 6.79   | 409.56 | loose tooth     |
| 143  | H485       | 3      | L                | 2     | 1     |              | 2.5            | 4.20   | 260.25 |                 |
| 144  | H485       | 3      | L                | 2     | 1     | 1            | 3              | 3.92   | 243.88 |                 |
| 145  | H485       | 3      | L                | 1,2   | 1     |              | 3.5            | 6.08   | 368.60 |                 |
| 146  | H485       | 3      | L                | 2     | 1     |              | 3              | 6.15   | 372.40 |                 |
| 148  | H485       | 3      | L                | 2     | 1     |              | 3.5            | 8.47   | 505.87 |                 |
| 149  | H485       | 3      | L                | 1,2   | 1     | 1            | 3              | 6.32   | 382.07 |                 |
| 150  | H485       | 3      | L                | 1,2   | 1     |              | 4              | 6.18   | 374.40 |                 |
| 153  | H485       | 3      | L                | 1,2   | 1     |              | 4              | 7.20   | 432.65 |                 |
| 154  | H485       | 3      | L                | 1,2   | 1     | 1            | 3              | 4.75   | 292.07 |                 |
| 155  | H485       | 3      | L                | 1,2   | 1     | 1            | 3              | 6.24   | 377.44 |                 |
| 156  | H485       | 3      | R                | 1,2   |       |              | 3              | 6.52   | 393.84 |                 |
| 159  | H485       | 3      | R                | 1,2   | 1     |              | 3              | 6.06   | 367.19 |                 |
| 173  | H485       | 3      | L                | 1,2   | 1     |              | 2              | 3.33   | 210.20 |                 |
| 174  | H485       | 3      | L                | 2     | 1     |              | 4              | 6.72   | 405.23 |                 |
| 175  | H485       | 3      | L                | 1,2   | 1     |              | 3              | 6.97   | 419.73 |                 |
| 176  | H485       | 3      | L                | 1,2,3 | 1     |              | 3              | 6.34   | 383.62 |                 |
| 177  | H485       | 3      | L                | 1,2   |       |              | 2              | 2.95   | 188.11 |                 |
| 178  | H485       | 3      | R                | 2     | 1     | 1            | 3.5            | 5.82   | 353.52 |                 |
| 180  | H485       | 3      | R                | 2     |       |              | 3              | 6.45   | 389.92 | loose tooth     |
| 1097 | H468       | 3      | L                | 1,2   | 1     |              | 2              | 3.62   | 226.43 |                 |
| 1098 | H468       | 3      | R                | 1,2   | 1     |              | 1.5            | 2.26   | 148.47 |                 |
| 1100 | H468       | 3      | R                | 1,2   |       |              | 3              | 5.70   | 346.31 |                 |
| 1141 | H441       | 3      | L                | 1,2   | 1     |              | 2              | 3.15   | 199.38 |                 |
| 1142 | H441       | 3      | L                | 1,2   |       |              | 2              | 2.53   | 164.07 |                 |
| 1143 | H441       | 3      | L                | 1,2   | 1     |              | 2              | 3.37   | 212.51 |                 |
| 1144 | H441       | 3      | L                | 1,2   | 1     | 1            | 2              | 4.50   | 277.25 |                 |
| 1147 | H441       | 3      | L                | 2     |       |              | 4              | 9.73   | 578.89 | loose tooth     |
| 1149 | H441       | 3      | R                | 1,2   | 1     |              | 2              | 3.22   | 203.80 |                 |
| 1150 | H441       | 3      | R                | 1,2   | 1     |              | 2              | 3.60   | 225.32 |                 |
| 1151 | H441       | 3      | R                | 1,2   |       |              | 2              | 3.46   | 217.77 |                 |

| ID   | Provenance | Period | Pharyngeal teeth |       |       |       | Status of A2   |        |                 | Note |
|------|------------|--------|------------------|-------|-------|-------|----------------|--------|-----------------|------|
|      |            |        | L/R              | A row | B row | C row | No. of grooves | MLD mm | Estimated BL mm |      |
| 1160 | H441       | 3      | L                | 2     | 1     | 1     | 2              | 2.56   | 165.46          |      |
| 1161 | H441       | 3      | R                | 1,2,3 | 1     | 1     | 2              | 2.84   | 181.60          |      |
| 1162 | H441       | 3      | R                | 1,2   | 1     |       | 2              | 3.90   | 242.75          |      |
| 1163 | H441       | 3      | R                | 1,2,3 | 1     |       | 2.5            | 4.17   | 258.12          |      |
| 1164 | H441       | 3      | R                | 2,3   | 1     |       | 2              | 2.60   | 168.20          |      |
